# Supplementary material
Source: Research Square preprint supplement (doi:10.21203/rs.3.rs-10004115/v1)
Supplement: Supplementary file 1 [file 392636adafd6ec8c8013a1df.docx]

# Univariate analysis for various independent factors with risk factors of NCD

**Table 1: Univariate analysis for association of various independent factors with random blood sugar levels**

| Variables | Classification | High >140mg/dl | Normal | Chi square (P Value) | Crude OR (95%CI) |
| --- | --- | --- | --- | --- | --- |
| Age group (years) | 30 | 29 (33.3) | 58 (66.7) | 18.0  **(<0.001)** | 6.5  (2.5-16.7) |
| 30 | 6 (7.1) | 78 (92.9) |
| Gender identity revealed | No | 4 (12.9) | 27 (87.1) | 1.3  (0.249) | 1.9  (0.6-5.9) |
| Yes | 31 (22.1) | 109 (77.9) |
| Work | Occasional  earning/  unemployment | 26 (20.5) | 101 (79.5) | Fisher’s exact test  0.998 | 1.0  (0.4-2.3) |
| Regular monthly wages | 9 (20.5) | 35 (79.5) |
| Family history of NCD | Yes | 12 (16.9) | 59 (83.1) | 0.9  (0.330) | 0.6  (0.3-1.5) |
| No | 23 (23.0) | 77 (77.0) |
| Physical activity | Inadequate (<600 MET) | 31 (20.0) | 124 (80.0) | Fisher’s exact test  0.744 | 0.7  (0.2-2.5) |
| Adequate (600 MET) | 4 (25.0) | 12 (75.0) |
| Living arrangement | Without family | 29 (23.4) | 95(76.6) | 2.3  (0.124) | 0.4  (0.2-1.2) |
| With family | 6 (12.8) | 41 (87.2) |
| Hypertension  ( 140/90 mm Hg) | Yes | 6 (25.0) | 18 (75.0) | Fisher’s exact test  (0.217) | 2.0  (0.7-5.9) |
| No | 19 (13.9) | 118 (86.1) |
| Current smoking | Yes | 13 (20.0) | 52 (80.0) | 0.0  (0.905) | 0.9  (0.4-2.1) |
| No | 22 (20.8) | 84 (79.2) |
| Current alcohol consumption | Yes | 15 (19.2) | 63 (80.8) | Fisher’s exact test  0.713) | 0.8  (0.4-1.8) |
| No | 20 (21.5) | 73 (78.5) |

**Table 2:Univariate analysis for association of various independent factors with hypertension.(BP 140/90 mm Hg )**

| Variables | Classification | Present | Absent | Chi square (P Value) | Crude OR (95%CI) |
| --- | --- | --- | --- | --- | --- |
| Age group (years) | 30 | 13 (16.3) | 67 (83.8) | 3.13  (0.634) | 1.23  (0.51-2.94) |
| 30 | 11 (13.6) | 70 (86.4) |
| Family history of NCD | Yes | 10 (14.1) | 61 (85.9) | 0.92  (0.79) | 0.89  (0.37-2.14) |
| No | 14 (15.6) | 76 (76.6) |
| Physical activity | Inadequate (<600 MET) | 23 9 (15.9) | 122 (84.1) | Fishers exact test  0.272 | 2.82  (0.35-22.47) |
| Adequate (600 MET) | 1 (6.3) | 15 (93.8) |
| Living arrangement | Without family | 17 (14.5) | 100 (85.5) | 2.23  (0.827) | 1.11  (0.42-2.90) |
| With family | 7 (15.9) | 37 (84.1) |
| Salt intake | High | 4 (22.7) | 14 (77.8) | 3.56  (0.355) | 1.75  (0.52-5.87) |
| Low | 20 (14) | 123 (86) |
| Fruits and vegetables intake | Inadequate (<5 servings) | 23 (13) | 131 (87) | **4.5**  **(0.001)** | 8.93  (1.86-42.89) |
| Adequate(5servings) | 4 (57.1) | 3 (42.9) |
| High RBS  ( 140mg/dL) | Yes | 6 (24) | 19 (76) | 0.99  (0.165) | 2.07  (0.72-5.87) |
| No | 18 (13.2) | 118 (86.8) |
| Current smoking | Yes | 10 (16.4) | 51 (83.6) | 2.56  (0.679) | 1.20  (0.49-2.91) |
| No | 14 (14) | 86 (86) |
| Current alcohol consumption | Yes | 15 (20) | 60 (80) | 10.1  (0.090) | 2.13  (0.87-5.22) |
| No | 9 (10.5) | 77 (89.5) |

**Table 3: Univariate analysis for association of various independent factors with overweight( BMI  23 kg/m2 )**

| Variables | Classification | Overweight | | Chi square (P Value) | Crude OR (95%CI) |
| --- | --- | --- | --- | --- | --- |
| **Yes** | **No** |
| Gender | Transman | 34 (91.9) | 3(8.1) | 23.3  (3.194) | 3.0(0.9-10.5) |
| Transwoman | 106 (79.1) | 28(20.9) |
| Age group (years) | 30 | 78 (89.7) | 9(10.3) | 8.5  (7.230) | 3.1(1.3-7.2) |
| 30 | 62 (73.8) | 22(26.2) |
| Gender identity revealed | Yes | 112 (80) | 28(20) | 32.2  (1.882) | 0.4(0.1-1.5) |
| No | 28 (90.3) | 3(9.7) |
| Work | Occasional earning/ unemployment | 108 (85) | 19(15) | 7.6  (3.338) | 2.1(0.9-4.9) |
| Regular monthly wages | 32 (72.7) | 12(27.3) |
| Family history of NCD | Yes | 65 (91.5) | 6(8.5) | 15.7  (7.662) | 3.6(1.4-9.3) |
| No | 75 (75) | 25(25) |
| Living arrangement | Without family | 102 (82.3) | 22(17.7) | 3.58  **(0.045)** | 0.9(0.4-2.2) |
| With family | 38 (80.9) | 9(19.1) |
| Salt intake | High | 15 (83.3) | 3(16.7) | Fishers exact test  (1.000) | 1.1(0.3-4.1) |
| Low | 125 (81.7) | 28(18.3) |
| High RBS  ( 140mg/dL) | Yes | 23 (65.7) | 12(34.3) | 45.3  (7.740) | 0.3(0.1-0.7) |
| No | 117 (86) | 19(14) |
| Current smoking | Yes | 57 (87.7) | 8(12.3) | 3.67  (2.394) | 1.9(0.8-4.7) |
| No | 83 (78.3) | 23(21.7) |
| Current alcohol consumption | Yes | 60 (76.9) | 18(23.1) | 39.2  (2.366) | 0.5(0.2-1.2) |
| No | 80 (86.0) | 13(14.0) |

**Table 4: Univariate analysis for association of independent factors with current alcohol consumption( Alcohol consumption in the last 1 month)**

| Variables | Classification | Yes | No | Chi square  (P Value) | Crude OR (95%CI) |
| --- | --- | --- | --- | --- | --- |
| Gender | Transman | 25 (67.6) | 12 (32.4) | 9.17  **(0.002)** | 3.2  (1.5 – 6.9) |
| Transwoman | 53 (39.6) | 81 (60.4) |
| Age group (years) | 30 | 29 (33.3) | 58 (66.7) | 10.77  **(0.001)** | 0.4  (0.2 – 0.7) |
| 30 | 49 (58.3) | 35 (41.7) |
| Gender identity revealed | Yes | 72 (51.4) | 68 (48.6) | 10.53  (**0.001)** | 4.4  (1.7 – 11.4) |
| No | 6 (19.4) | 25 (80.6) |
| Work | Occasional earning/unemployment | 44 (34.6) | 83(65.4) | 24.0  **(<0.001)** | 0.2  (0.1 – 0.3) |
| Regular monthly wages | 34 (77.3) | 10 (22.7) |
| Hypertension  ( 140/90 mm Hg) | Yes | 15 (62.5) | 9 (37.5) | 2.87  (0.090) | 2.1  (0.9 – 5.2) |
| No | 60 (43.8) | 77 (56.2) |
| Physical activity | Inadequate (<600 MET) | 65 (41.9) | 90 (58.1) | 9.03  **(0.003)** | 0.2  (0.05 – 0.6) |
| Adequate (600 MET) | 13 (81.3) | 3 (18.8) |
| Living arrangement | Without family | 65 (52.4) | 59 (47.6) | 8.42  **(0.004)** | 1.3  (1.2 – 1.7) |
| With family | 13 (27.7) | 34 (72.3) |
| Overweight | Yes | 60 (42.9) | 80 (57.1) | 2.37  (0.124) | 0.5  (0.2 – 1.2) |
| No | 18 (58.1) | 13 (41.9) |
| High RBS  ( 140mg/dL) | Yes | 15 (42.9) | 20 (57.1) | 0.14  (0.713) | 0.9  (0.4 – 1.8) |
| No | 63 (46.3) | 73 (53.7) |
| Current smoking | Yes | 33 (50.8) | 32 (49.2) | 1.12  (0.289) | 1.4  (0.8 – 2.6) |
| No | 45 (42.5) | 61 (57.5) |

**Table 5: Univariate analysis for factors affecting current smoking (ever smoked in last 30 days)**

| Variables | Classification | Yes | No | Chi square (P Value) | Crude OR (95%CI) |
| --- | --- | --- | --- | --- | --- |
| Gender | Transman | 12 (32.4) | 25 (67.6) | 0.62 (0.430) | 0.7  (0.3 – 1.6) |
| Transwoman | 53 (39.6) | 81 (60.4) |
| Age group (years) | 30 | 31 (35.6) | 56 (64.4) | 0.43  (0.514) | 0.8  (0.4 – 1.5) |
| 30 | 34 (40.5) | 50 (59.5) |
| Gender identity revealed | Yes | 55 (39.3) | 85 (60.7) | 0.53  (0.466) | 1.4  (0.6 – 3.1) |
| No | 10 (32.3) | 21 (67.7) |
| Work | Occasional earning/unemployment | 45 (35.4) | 82 (64.6) | 1.4  (0.238) | 0.7  (0.3 – 1.3) |
| Regular monthly wages | 20 (45.5) | 24 (54.5) |
| Hypertension  ( 140/90 mm Hg) | Yes | 10 (41.7) | 14 (58.3) | 0.17  (0.679) | 1.2  (0.5 – 2.9) |
| No | 51 (37.2) | 86 (62.8) |
| Physical activity | Inadequate (<600 MET) | 59 (38.1) | 96 (61.9) | 0.002  (0.965) | 1.0  (0.4 – 3.0) |
| Adequate (600 MET) | 6 (37.5) | 10 (62.5) |
| Living arrangement | With family | 17 (36.2) | 76 (61.3) | 0.10  (0.760) | 0.9  (0.4 – 1.8) |
| Without family | 48 (38.7) | 30 (63.8) |
| Overweight | Yes | 57 (40.7) | 83 (59.3) | 2.39  (0.122) | 2.0  (0.8 – 4.7) |
| No | 8 (25.8) | 23 (74.2) |
| High RBS  ( 140mg/dL) | Yes | 13 (37.1) | 22 (62.9) | 0.01  (0.905) | 1.0  (0.4 – 2.1) |
| No | 52 (38.2) | 84 (61.8) |
| Current alcohol consumption | Yes | 33 (42.3 | 45 (57.7) | 1.12  (0.289) | 1.4  (0.8 – 2.6) |
| No | 32 (34.4) | 61 (65.6) |

**Table 6: Univariate analysis for association of various independent factors with high waist-hip ratio**

| Variables | Classification | High waist-hip ratio | Low waist-hip ratio | Chi square (P Value) | Crude OR (95%CI) |
| --- | --- | --- | --- | --- | --- |
| Gender | Transman | 34(91.9) | 3(8.1) | 0.62 (0.430) | 3.0(0.9-10.5) |
| Transwoman | 106(79.1) | 28(20.9) |
| Age group (years) | 30 | 78(89.7) | 9(10.3) | 0.43  (0.514) | 3.1(1.3-7.2) |
| 30 | 62(73.8) | 22(26.2) |
| Gender identity revealed | Yes | 112(80) | 28(20) | 0.53  (0.466) | 0.4(0.1-1.5) |
| No | 28(90.3) | 3(9.7) |
| Work | Occasional earning/ unemployment | 108(85) | 19(15) | 1.4  (0.238) | 2.1(0.9-4.9) |
| Regular monthly wages | 32(72.7) | 12(27.3) |
| Family history of NCD | Yes | 65(91.5) | 6(8.5) | 0.17  (0.679) | 3.6(1.4-9.3) |
| No | 75(75) | 25(25) |
| Living arrangement | Without family | 102(82.3) | 22(17.7) | 0.10  (0.760) | 0.9(0.4-2.2) |
| With family | 38(80.9) | 9(19.1) |
| Salt intake | High | 15(83.3) | 3(16.7) | 2.39  (0.122) | 1.1(0.3-4.1) |
| Low | 125(81.7) | 28(18.3) |
| High RBS  ( 140mg/dL) | Yes | 23(65.7) | 12(34.3) | 1.12  (0.289) | 0.3(0.1-0.7) |
| No | 11786) | 19(14) |
| Current smoking | Yes | 57(87.7) | 8(12.3) | 23.1  **(0.006)** | 1.9(0.8-4.7) |
| No | 83(78.3) | 23(21.7) |
| Current alcohol consumption | Yes | 60(76.9) | 18(23.1) | 47.8  **(0.016)** | 0.5(0.2-1.2) |
| No | 80(86.0) | 13(14.0) |

**Table 7: Univariate analysis for factors affecting physical inactivity (<600 MET / day)**

| Variables | Classification | Yes | No | Chi square (P Value) | Crude OR (95%CI) |
| --- | --- | --- | --- | --- | --- |
| Gender | Transman | 27(73.0) | 10(27.0)_ | Fischer Exact **<0.001** | 0.12(0.04-0.37) |
| Transwoman | 128(95.5) | 6(4.5) |
| Age group (years) | 30 | 81(93.1) | 6(6.9) | 1.26  (0.261) | 1.82(0.63-5.26) |
| 30 | 74(88.1) | 10(11.9) |
| Work | Occasional earning/unemployment | 125(98.4) | 2(1.6) | Fisher Exact  **<0.001** | 29.16(6.28-135.26) |
| Regular monthly wages | 30(68.2) | 14(31.8) |
| Hypertension  ( 140/90 mm Hg) | Yes | 23(95.8) | 1(4.2) | Fisher Exact  0.47 | 2.82(0.35-22.47) |
| No | 122(89.1) | 15(10.9) |
| Living arrangement | With family | 43(91.5) | 4(8.5) | Fisher Exact  1.00 | 1.15(0.35-3.76) |
| Without family | 112(90.3) | 12(9.7) |
| Overweight | Yes | 125(89.3) | 15(10.7) | Fisher Exact  0.31 | 0.27(0.03-2.18) |
| No | 30(96.8) | 1(3.2) |
| High RBS  ( 140mg/dL) | Yes | 31(88.6) | 4(11.4) | Fisher Exact  0.74 | 0.75(0.22-2.48) |
| No | 124(91.2) | 12(8.8) |
| Current alcohol consumption | Yes | 65(83.3) | 13(16.7) | 9.03  **(0.003)** | 0.17(0.05-0.60) |
| No | 90(96.8) | 3(3.2) |
| Current  smoking | Yes | 59(90.8) | 6(9.2) | 0.002  (0.965) | 1.02(0.35-2.97) |
| No | 96(90.6) | 10(9.4) |
| Overweight | Yes | 125(89.3) | 15(10.7) | Fisher Exact  0.310 | 0.27(0.04-2.19) |
| No | 30(96.8) | 1(3.2) |

**Table 8: Univariate analysis for factors affecting high salt intake**

| Variables | Classification | Yes | No | Chi square (P Value) | Crude OR (95%CI) |
| --- | --- | --- | --- | --- | --- |
| Gender | Transman | 2(5.4) | 35(94.6) | Fisher Exact  0.368 | 0.42(0.09-1.92) |
| Transwoman | 16(11.9) | 118(88.1) |
| Age group (years) | 30 | 5(5.7) | 82(94.3) | 4.925  **(0.038**) | 0.33(0.11-0.98) |
| 30 | 13(15.5) | 71(84.5) |
| Work | Occasional earning/unemployment | 15(11.8) | 112(88.2) | Fisher Exact  (0.569) | 1.83(0.50-6.65) |
| Regular monthly wages | 3(6.8) | 41(93.2) |
| Hypertension  ( 140/90 mm Hg) | Yes | 4(16.7) | 20(83.3) | Fisher Exact  (0.315) | 1.76(0.52-5.88) |
| No | 14(10.2) | 123(89.8) |
| Living arrangement | With family | 3(6.4) | 44(93.6) | Fisher Exact  0.404 | 0.50(0.14-1.80) |
| Without family | 15(12.1) | 109(87.9) |
| Overweight | Yes | 15(10.7) | 125(89.3) | Fisher Exact  1.000 | 1.12(0.30-4.13) |
| No | 3(9.7) | 28(90.3) |
| Fruits and vegetables intake | Inadequate | 16(9.8) | 148(90.2) | Fisher Exact  0.160 | 3.70(0.66-20.64) |
| Adequate | 2(28.6) | 5(71.4) |
| Current alcohol consumption | Yes | 10(12.8) | 68(87.2) | 0.801  (0.371) | 1.56(0.56-4.18) |
| No | 8(8.6) | 85(91.4) |
| Current  smoking | Yes | 10(15.4) | 55(84.6) | 2.628  (0.105) | 2.23(0.83-5.97) |
| No | 8(7.5) | 98(92.5) |

**Table 9: Univariate analysis for factors affecting inadequate intake of fruits and vegetables.**

| Variables | Classification | Yes | No | Chi square (P Value) | Crude OR (95%CI) |
| --- | --- | --- | --- | --- | --- |
| Age group (years) | 30 | 83(95.4) | 4(4.6) | Fisher Exact  1.000 | 1.30(0.28-6.00) |
| 30 | 81(96.4) | 3(3.6) |
| Hypertension  ( 140/90 mm Hg) | Yes | 4(16.7) | 20(83.3) | Fisher Exact  **0.010** | 8.93(1.86-42.89) |
| No | 3(2.2) | 134(97.8) |
| Salt intake | High | 2(11.1) | 16(88.9) | Fisher Exact  0.160 | 3.70(0.66-20.64) |
| Normal | 5(3.3) | 148(96.7) |
| Current alcohol consumption | Yes | 4(5.1) | 74(94.9) | Fisher Exact  0.703 | 1.62(0.35-7.48) |
| No | 3(3.2) | 90(96.8) |
| Current  smoking | Yes | 1(1.5) | 54(98.5) | Fisher Exact  0.255 | 0.260(0.031-2.214) |
| No | 6(5.7) | 100(94.3) |
